# Supplementary material for: A Comprehensive Approach to Sample Preparation for Electron Microscopy and the Assessment of Mitochondrial Morphology in Tissue and Cultured Cells
Source: PubMed Central journal article supplement (PMC10615857; doi:10.1002/adbi.202200202), 2023-05-04
Supplement: NIHMS1917700-supplement-Supplementary_Material.pdf [file NIHMS1917700-supplement-Supplementary_Material.pdf]

# ADVANCED BIOLOGY

## Supporting Information

for *Adv. Biology*, DOI 10.1002/adbi.202200202

A Comprehensive Approach to Sample Preparation for Electron Microscopy and the Assessment of Mitochondrial Morphology in Tissue and Cultured Cells

*Antentor Hinton Jr.\**, *Prasanna Katti*, *Trace A. Christensen*, *Margaret Mungai*, *Jianqiang Shao*, *Liang Zhang*, *Sergey Trushin*, *Ahmad Alghanem*, *Adam Jaspersen*, *Rachel E. Geroux*, *Kit Neikirk*, *Michelle Biete*, *Edgar Garza Lopez*, *Bryanna Shao*, *Zer Vue*, *Larry Vang*, *Heather K. Beasley*, *Andrea G. Marshall*, *Dominique Stephens*, *Steven Damo*, *Jessica Ponce*, *Christopher K. E. Bleck*, *Innes Hicsasmaz*, *Sandra A. Murray*, *Ranthonny A. C. Edmonds*, *Andres Dajles*, *Young Do Koo*, *Serif Bacevac*, *Jeffrey L. Salisbury*, *Renata O. Pereira*, *Brian Glancy\**, *Eugenia Trushina\** and *E. Dale Abel\**

## Supporting Information

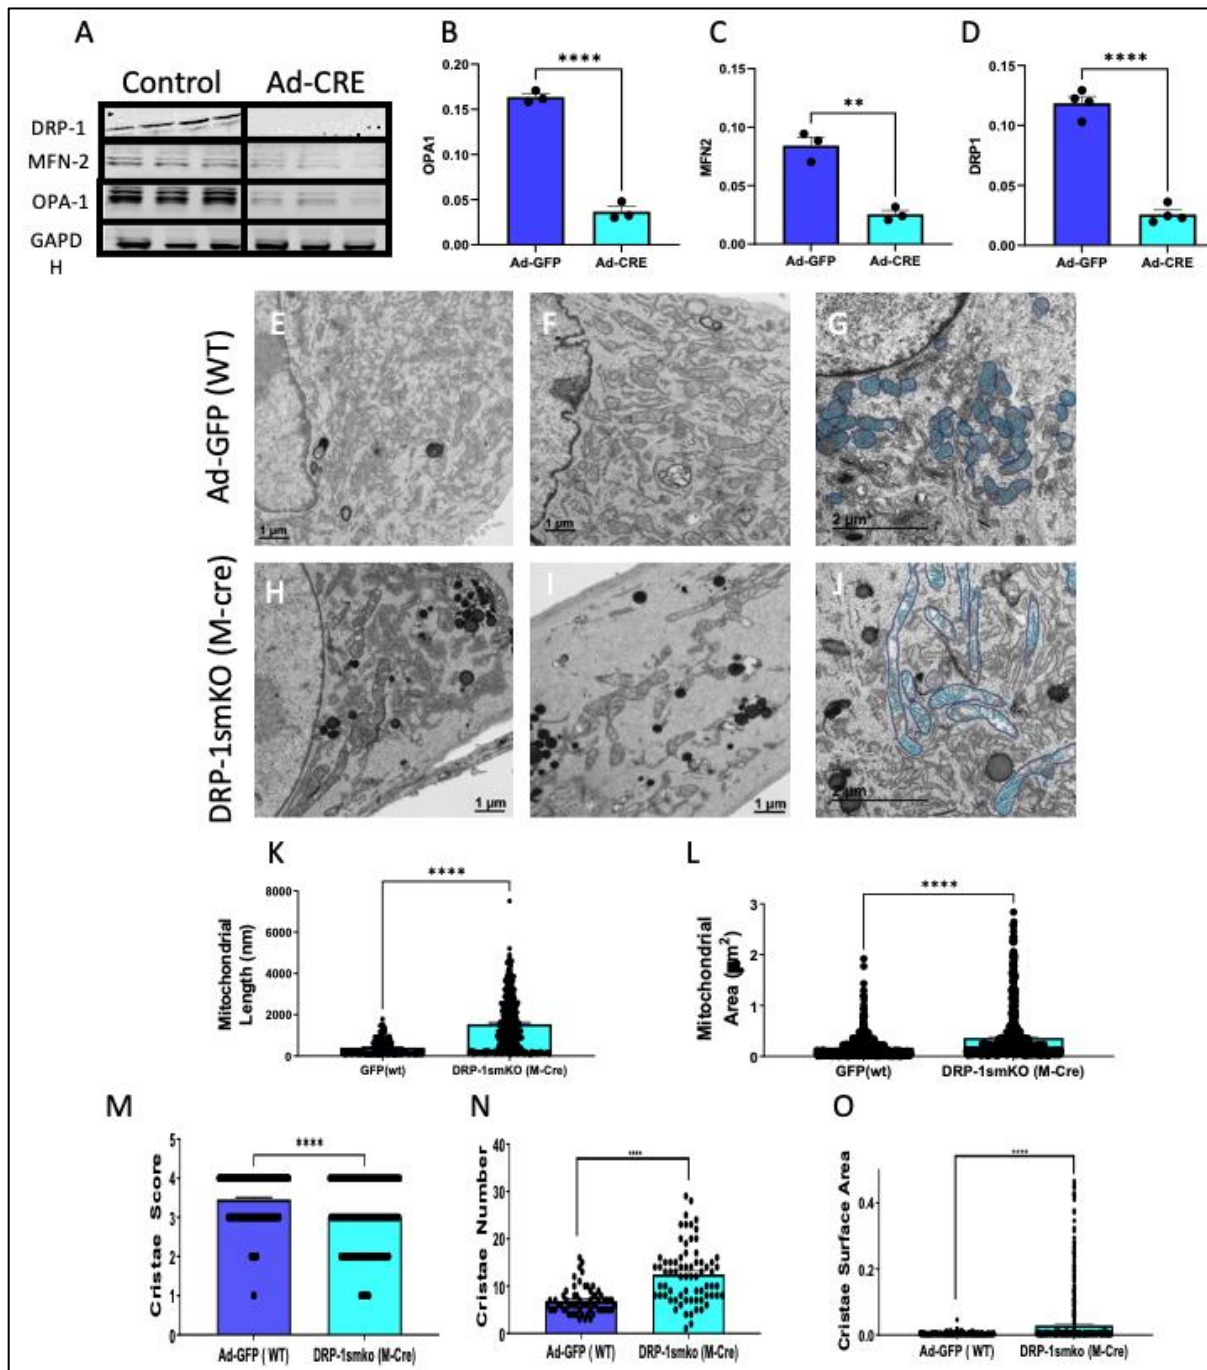

**Figure S1. Quantification of mitochondrial characteristics in *Opa1*-deficient skeletal muscle myoblasts and *Mfn2*-deficient or *Opa1*-deficient skeletal muscle myotubes.**

**A.** Western blot shows successful knockout and reduced expression of DRP-1, MFN2, and OPA1. GAPDH was used as a control. **B-D.** Qualitative polymerase chain reaction showed reduced *Opa1*, *Drp1* and

*Mfn2* gene expression. Ultrastructure of control (E-G) and *Drp-1*-deficient (H-J) primary skeletal muscle myotubes. Quantification of mitochondria length (K), mitochondria area (L), cristae score (M), cristae number (N), and cristae surface area (O) in control and *Drp-1*-deficient primary skeletal muscle myotubes. Significance was determined using a Mann-Whitney *t*-test. \*\* $P < 0.01$ , \*\*\*\* $P < 0.0001$ .

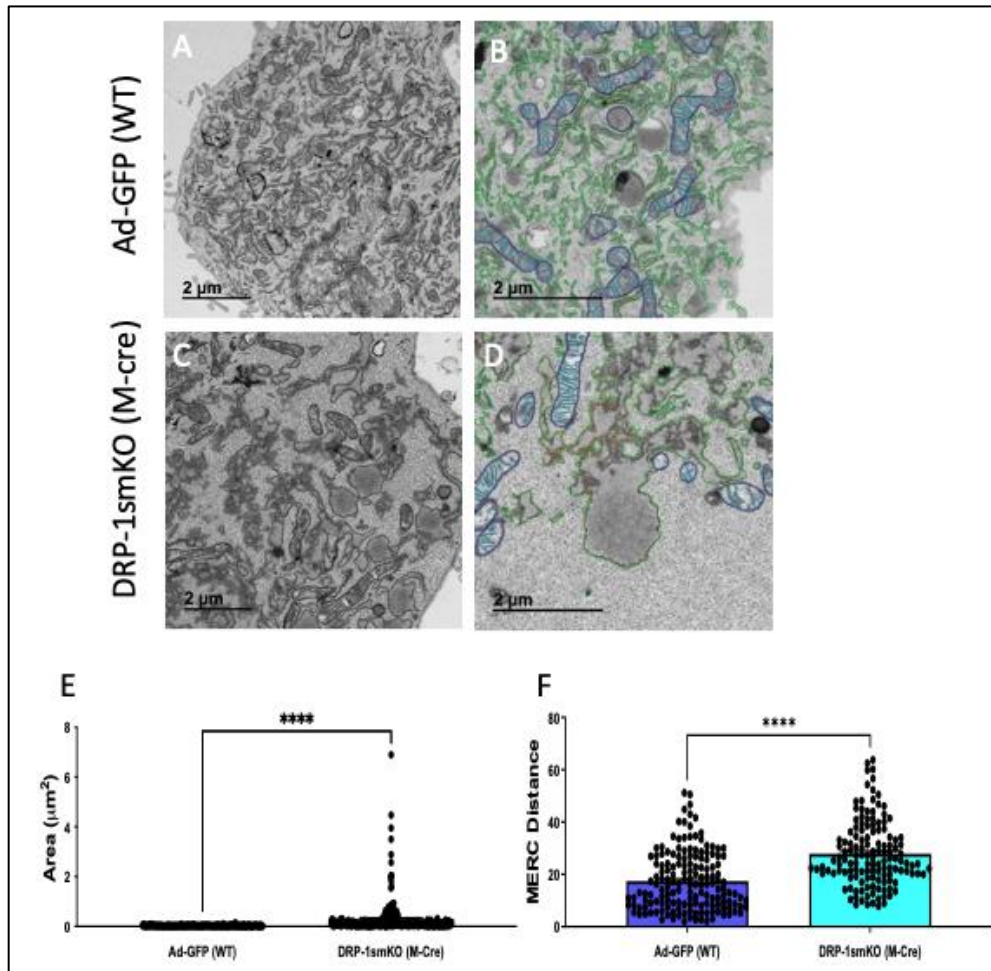

**Figure S2. MERCs ultrastructure in *Drp-1*-deficient primary skeletal muscle myotubes.**

Ultrastructure of control (A-B) and *Drp-1*-deficient (C-D) primary skeletal muscle myotubes. Significant increase in area (E) and MERCs distance (F) were observed in *Drp-1* KO cells compared to control. Significance was determined using a Mann-Whitney *t*-test. \* $P < 0.05$ , \*\* $P < 0.01$ , \*\*\* $P < 0.001$ , \*\*\*\* $P < 0.0001$ .

**Video S1.** 3D reconstruction of MERCs in WT drosophila flight muscle.

**Video S2.** 3D reconstruction of MERCs in drosophila flight muscle with *Opa1* knockdown.

**Video S3.** 3D reconstruction of MERCs in *Opa1<sup>fl/fl</sup>* mouse myotubes.

**Video S4.** 3D reconstruction of MERCs in *Opa1<sup>fl/fl</sup>-Cre* myotubes.

**Video S5.** 3D reconstruction of mitochondria membranes (red), ER (green), actin (blue), LDs (cyan), lysosomes (magenta), and MERCs (white space) in WT mouse gastrocnemius muscle.
